# Supplementary material for: Unraveling Cadmium Toxicity in Trifolium repens L. Seedling: Insight into Regulatory Mechanisms Using Comparative Transcriptomics Combined with Physiological Analyses
Source: MDPI journal article supplement (doi:10.3390/ijms23094612), 2022-04-21

RT3 vs RT0 GO

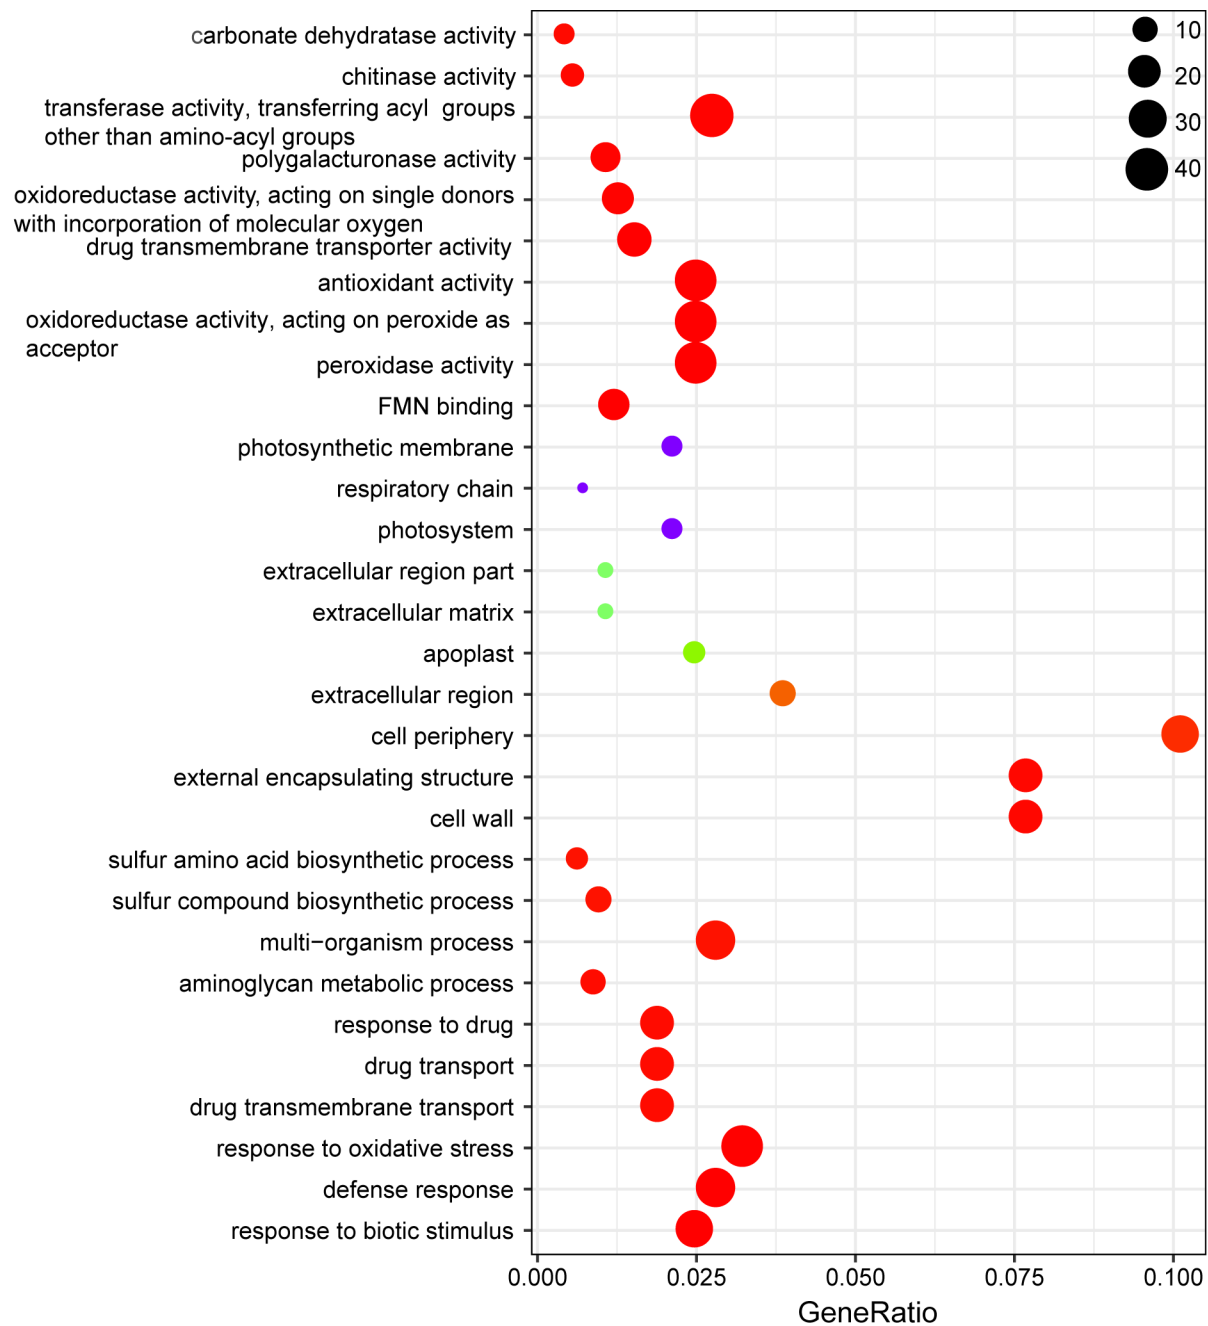

RT3 vs RT0 KEGG

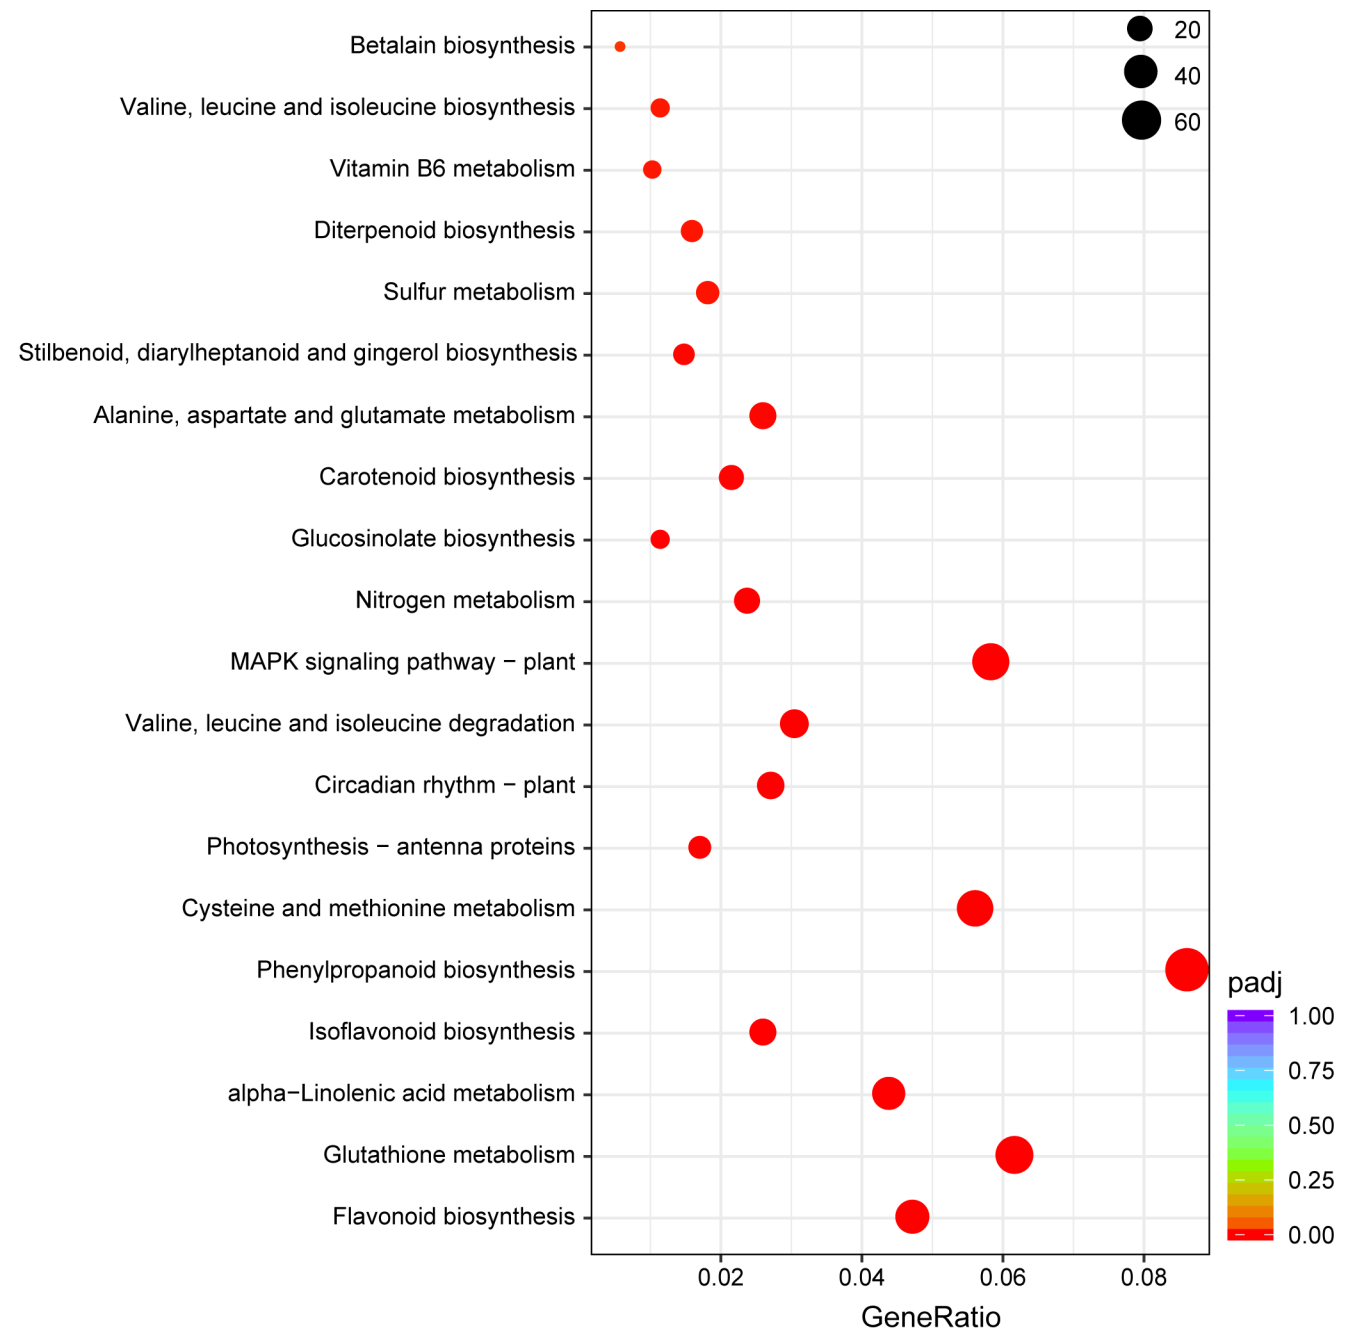

RT12 vs RT3 GO

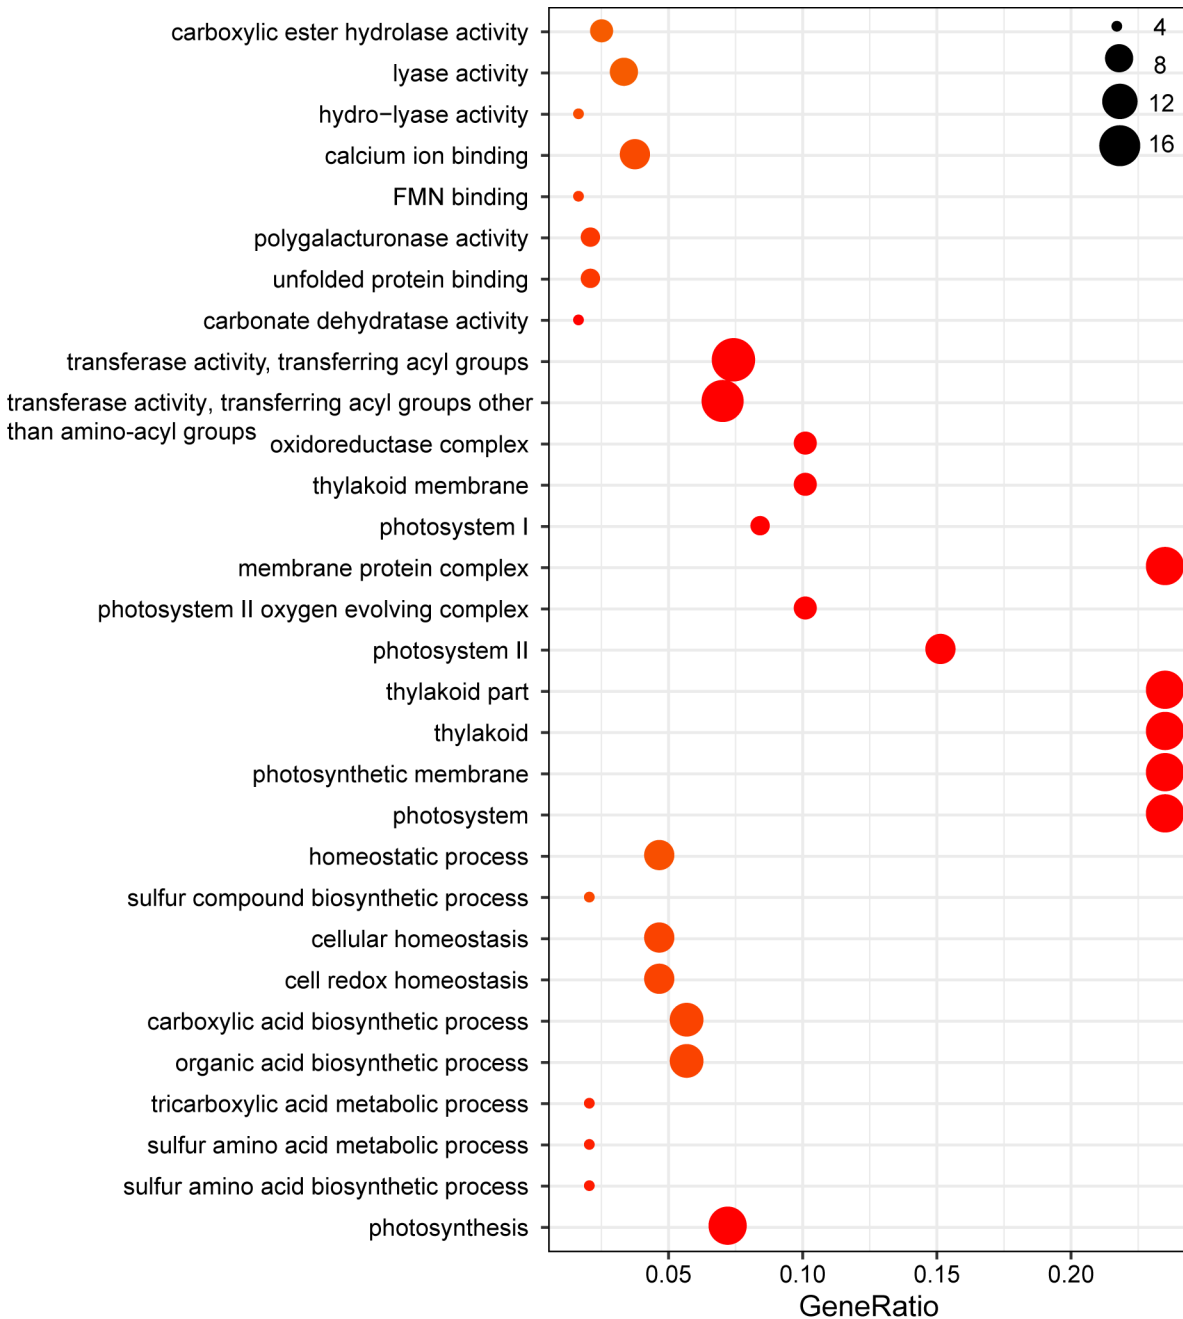

RT12 vs RT3 KEGG

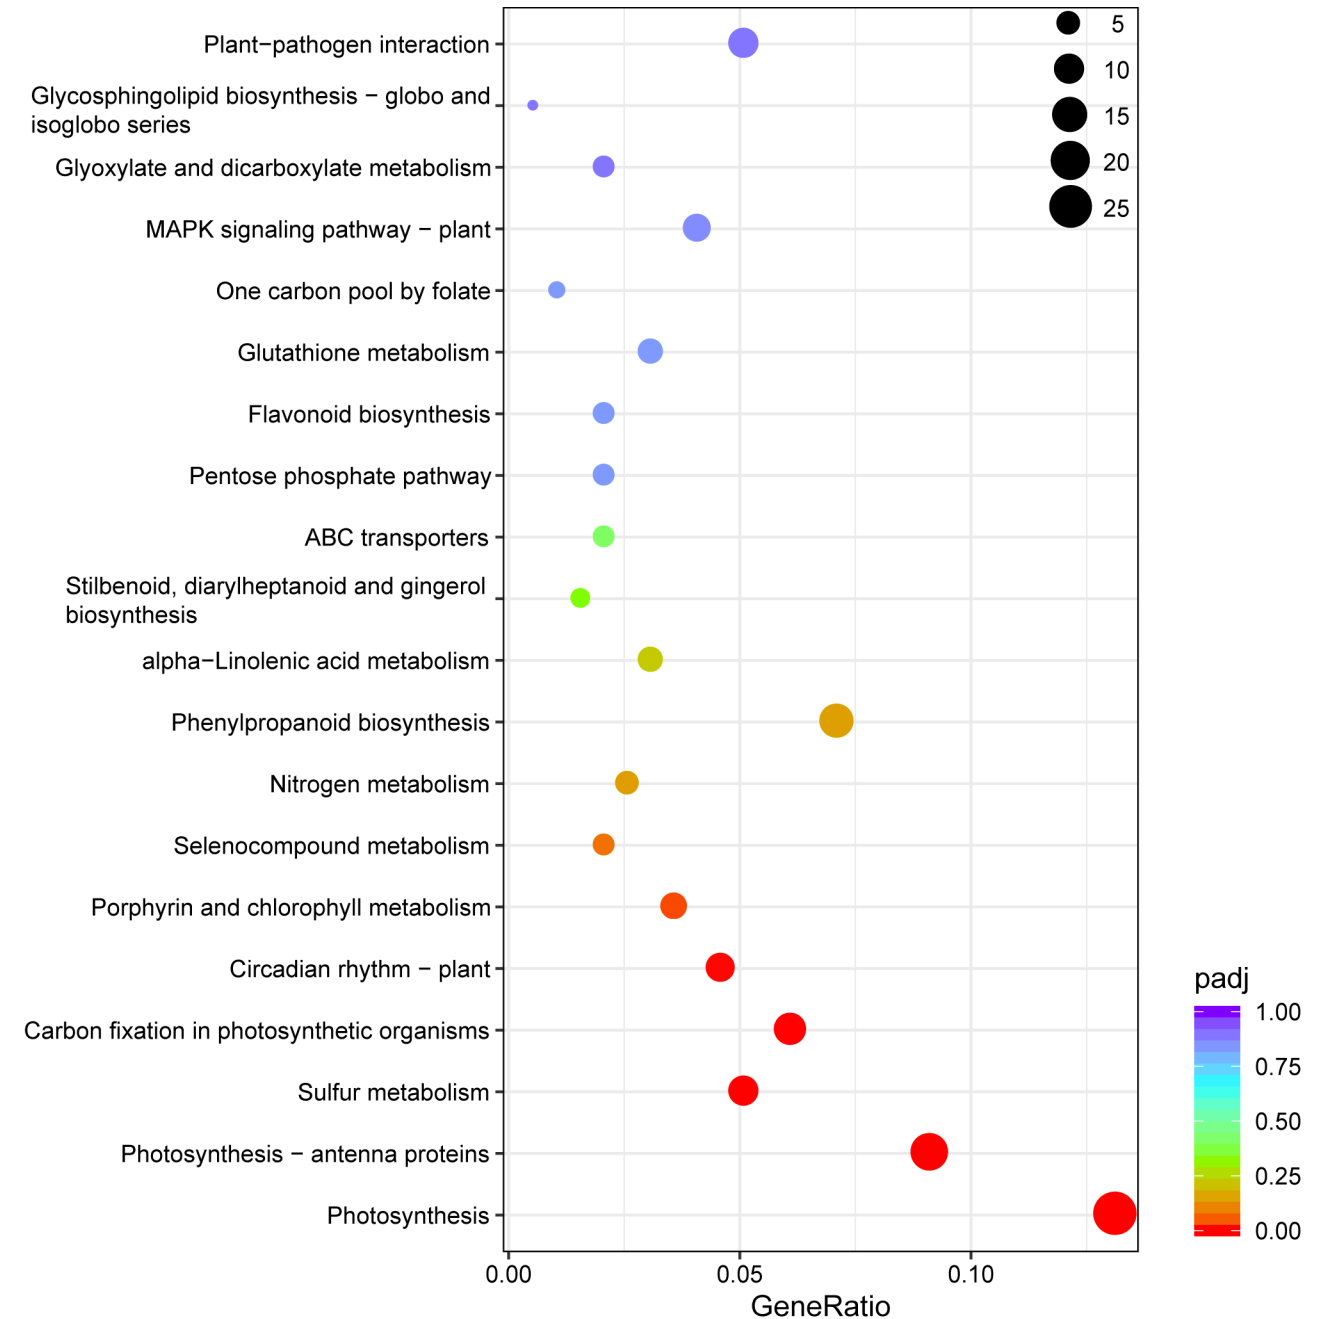

RT24 vs RT12 GO

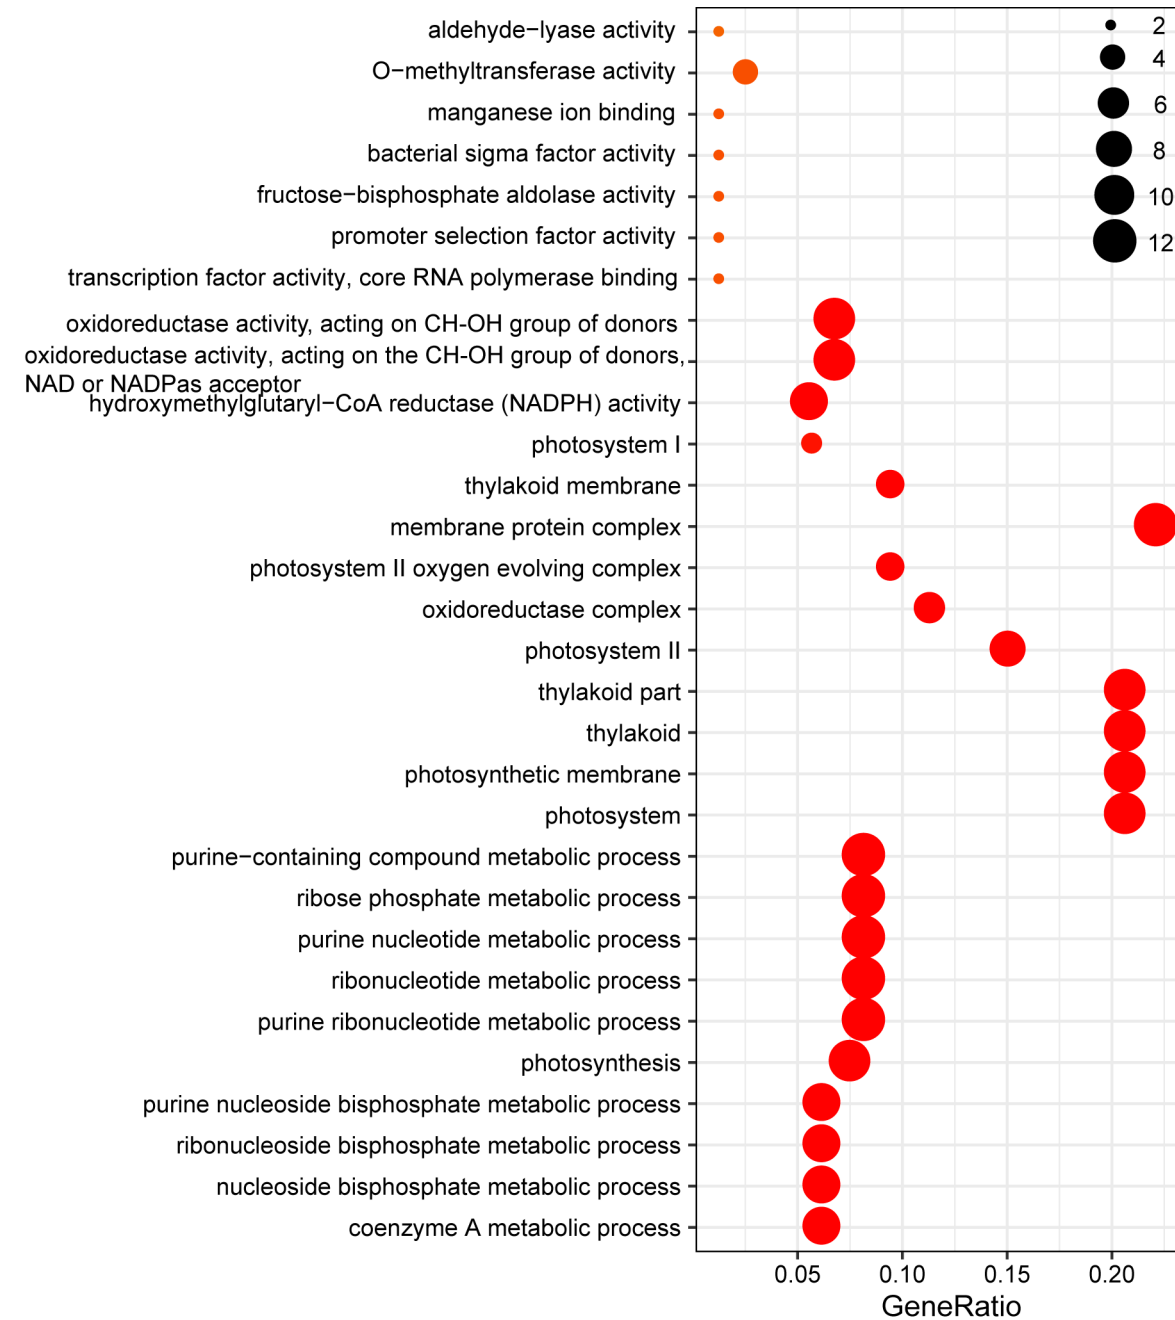

RT24 vs RT12 KEGG

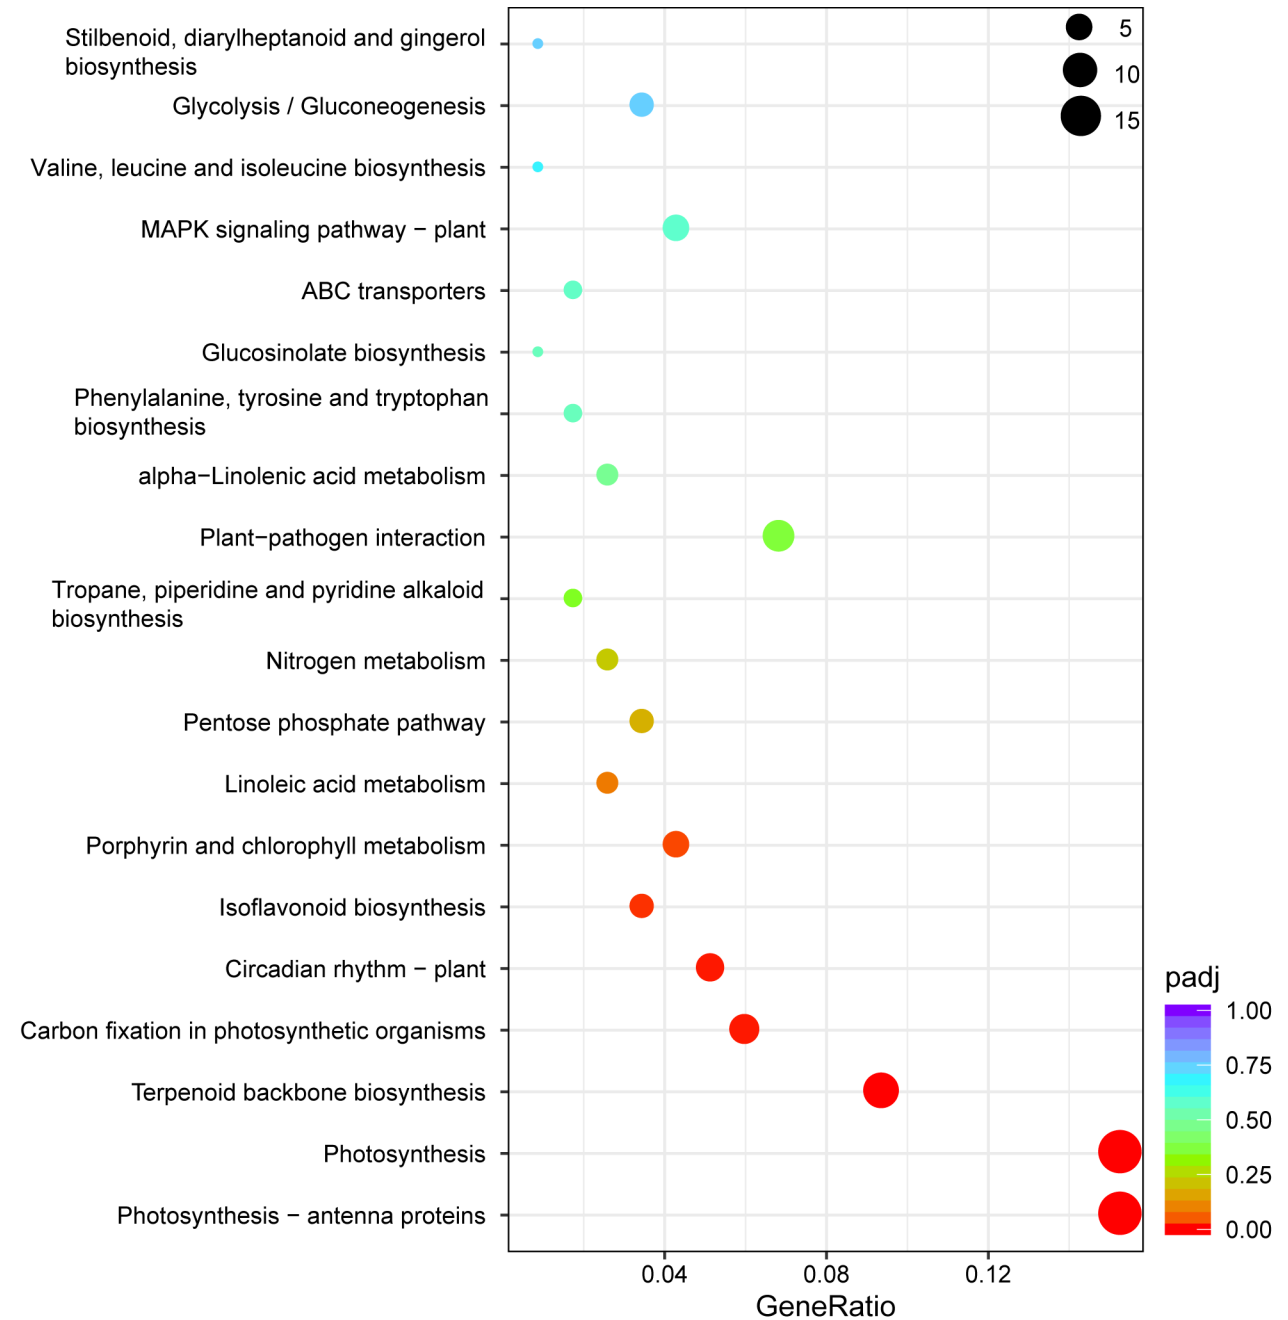

# LT3 vs LT0 GO

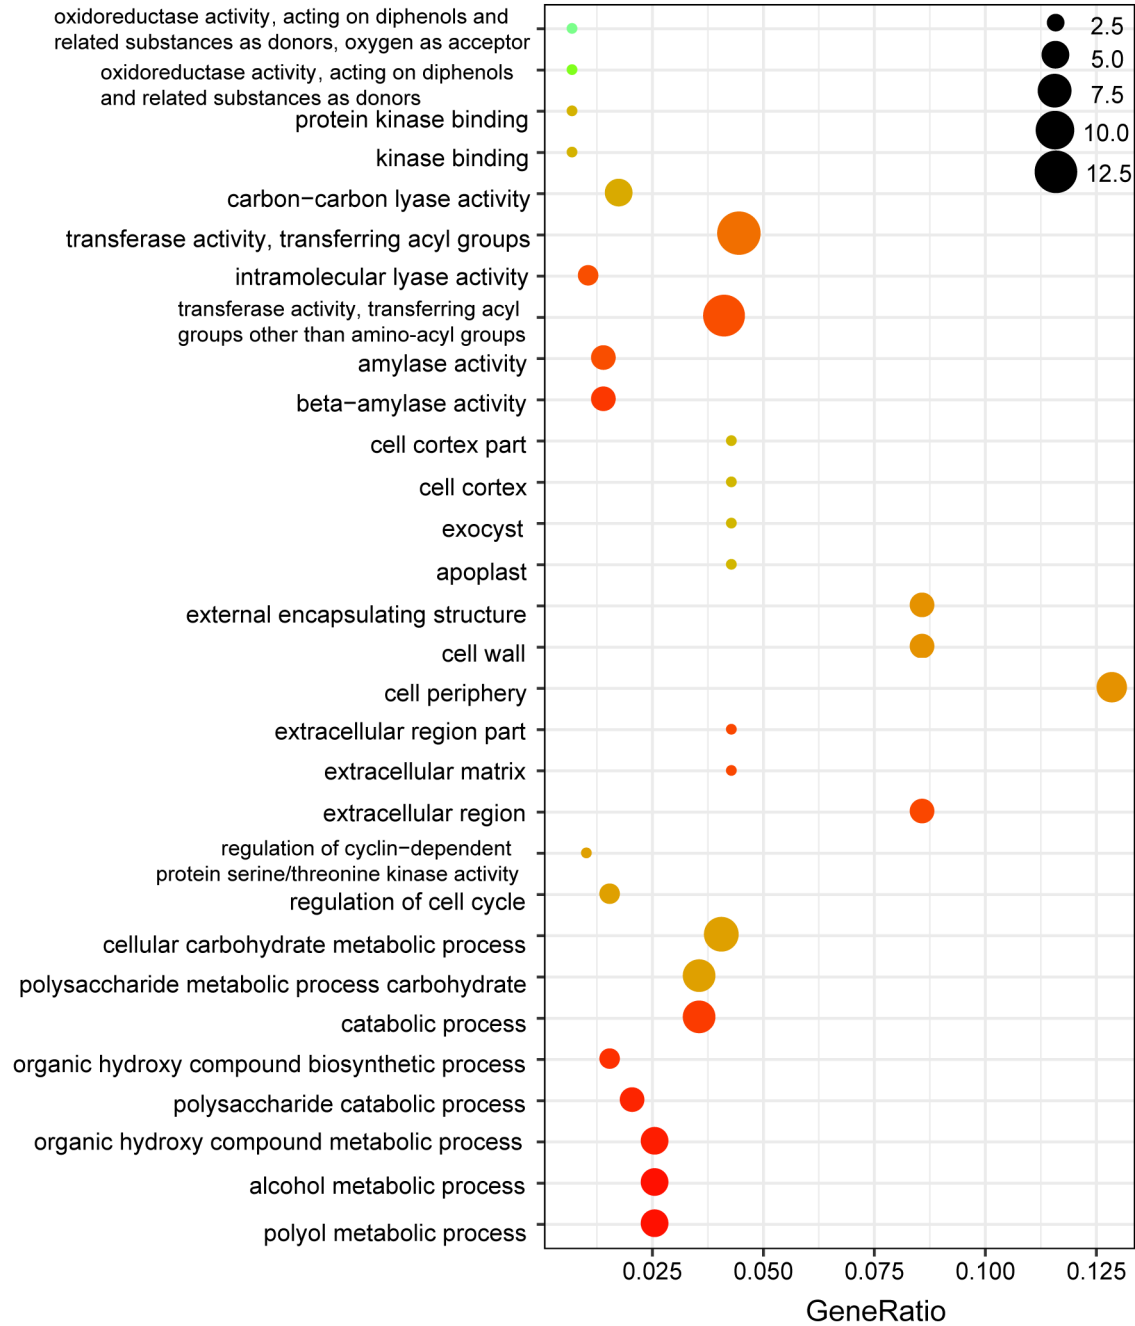

# LT3 vs LT0 KEGG

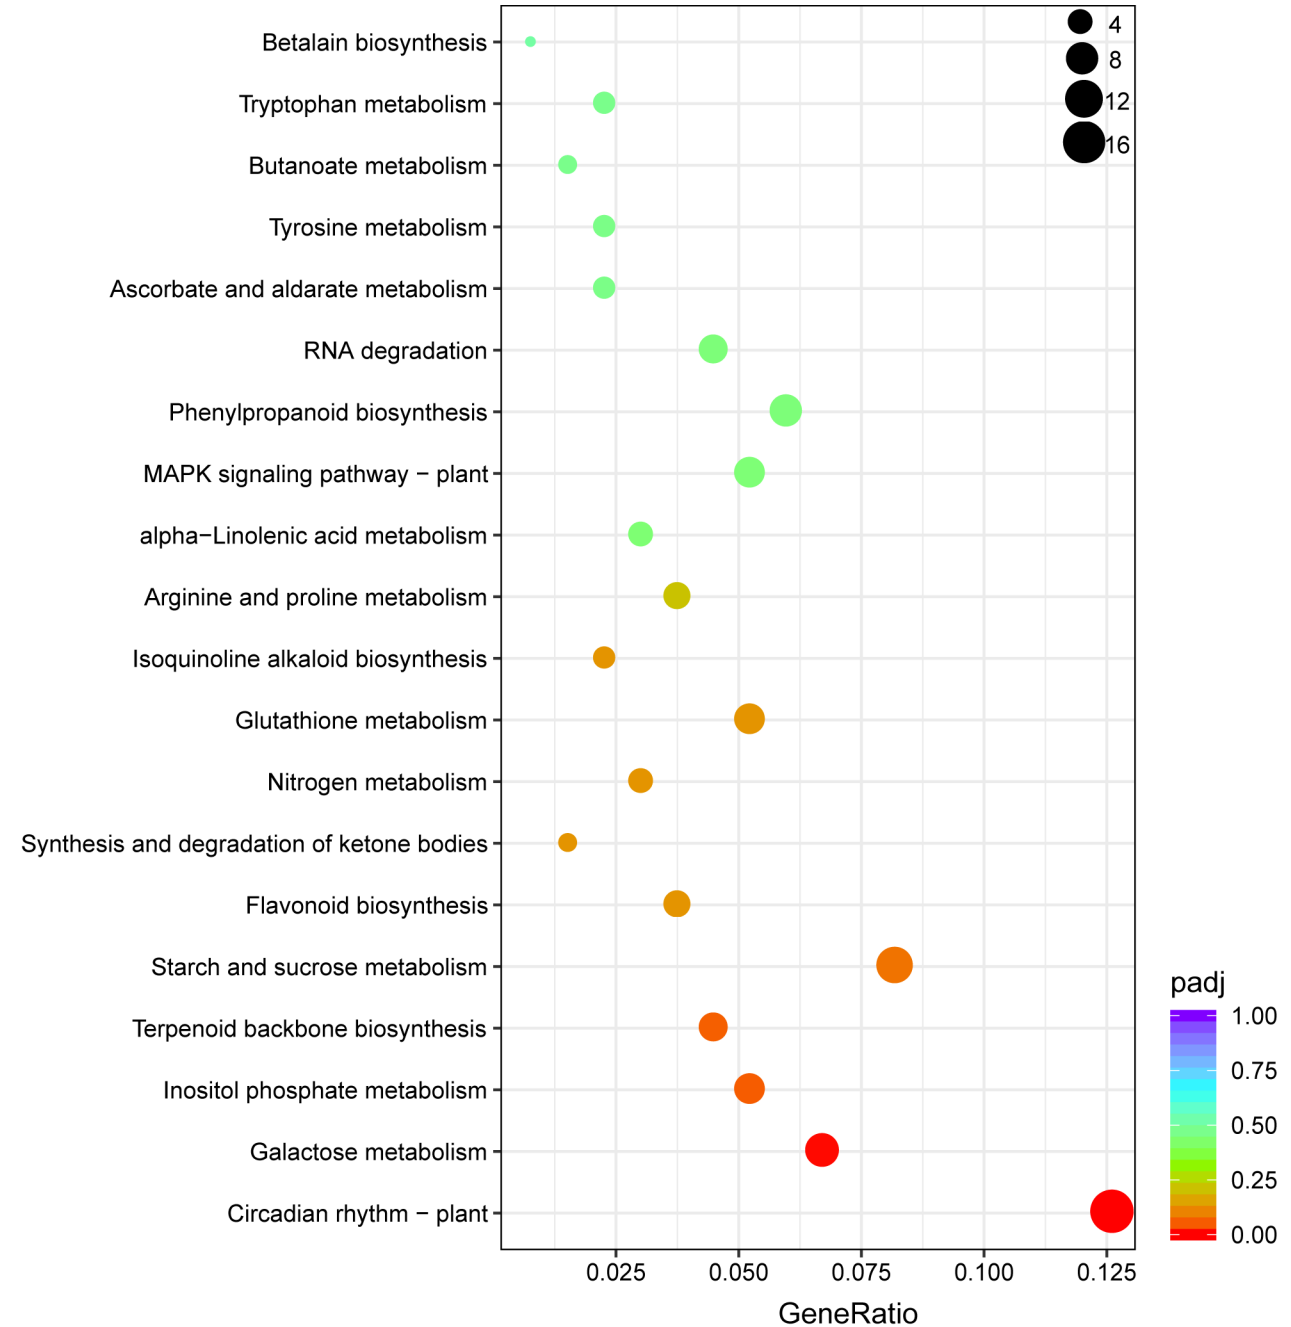

RT72 vs RT24 GO

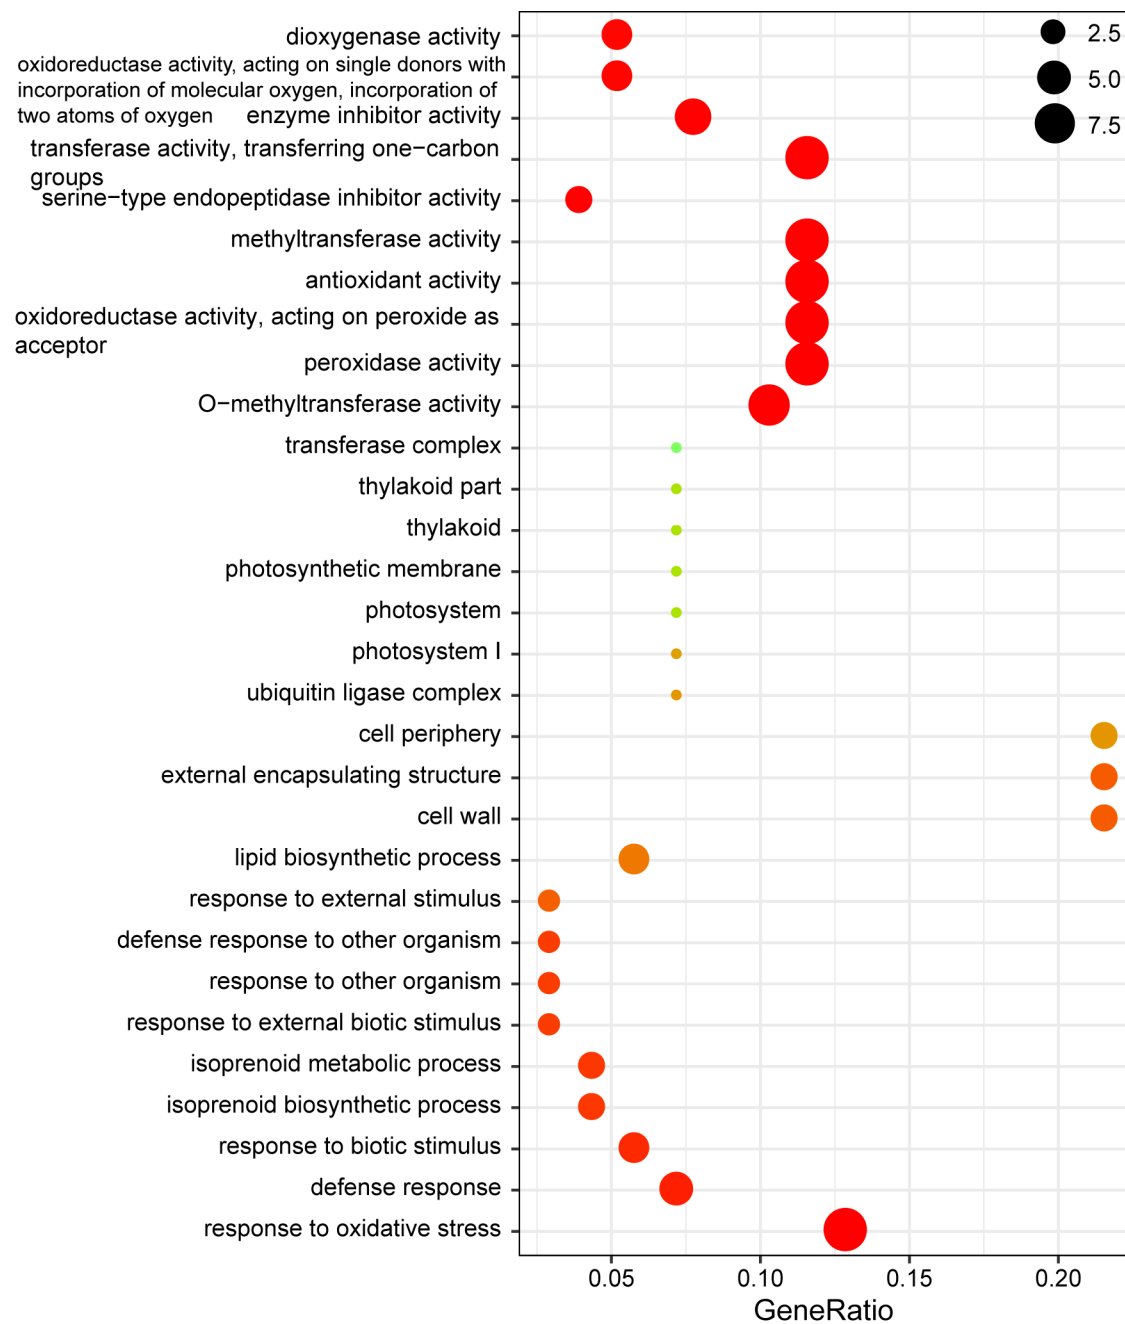

RT72 vs RT24 KEGG

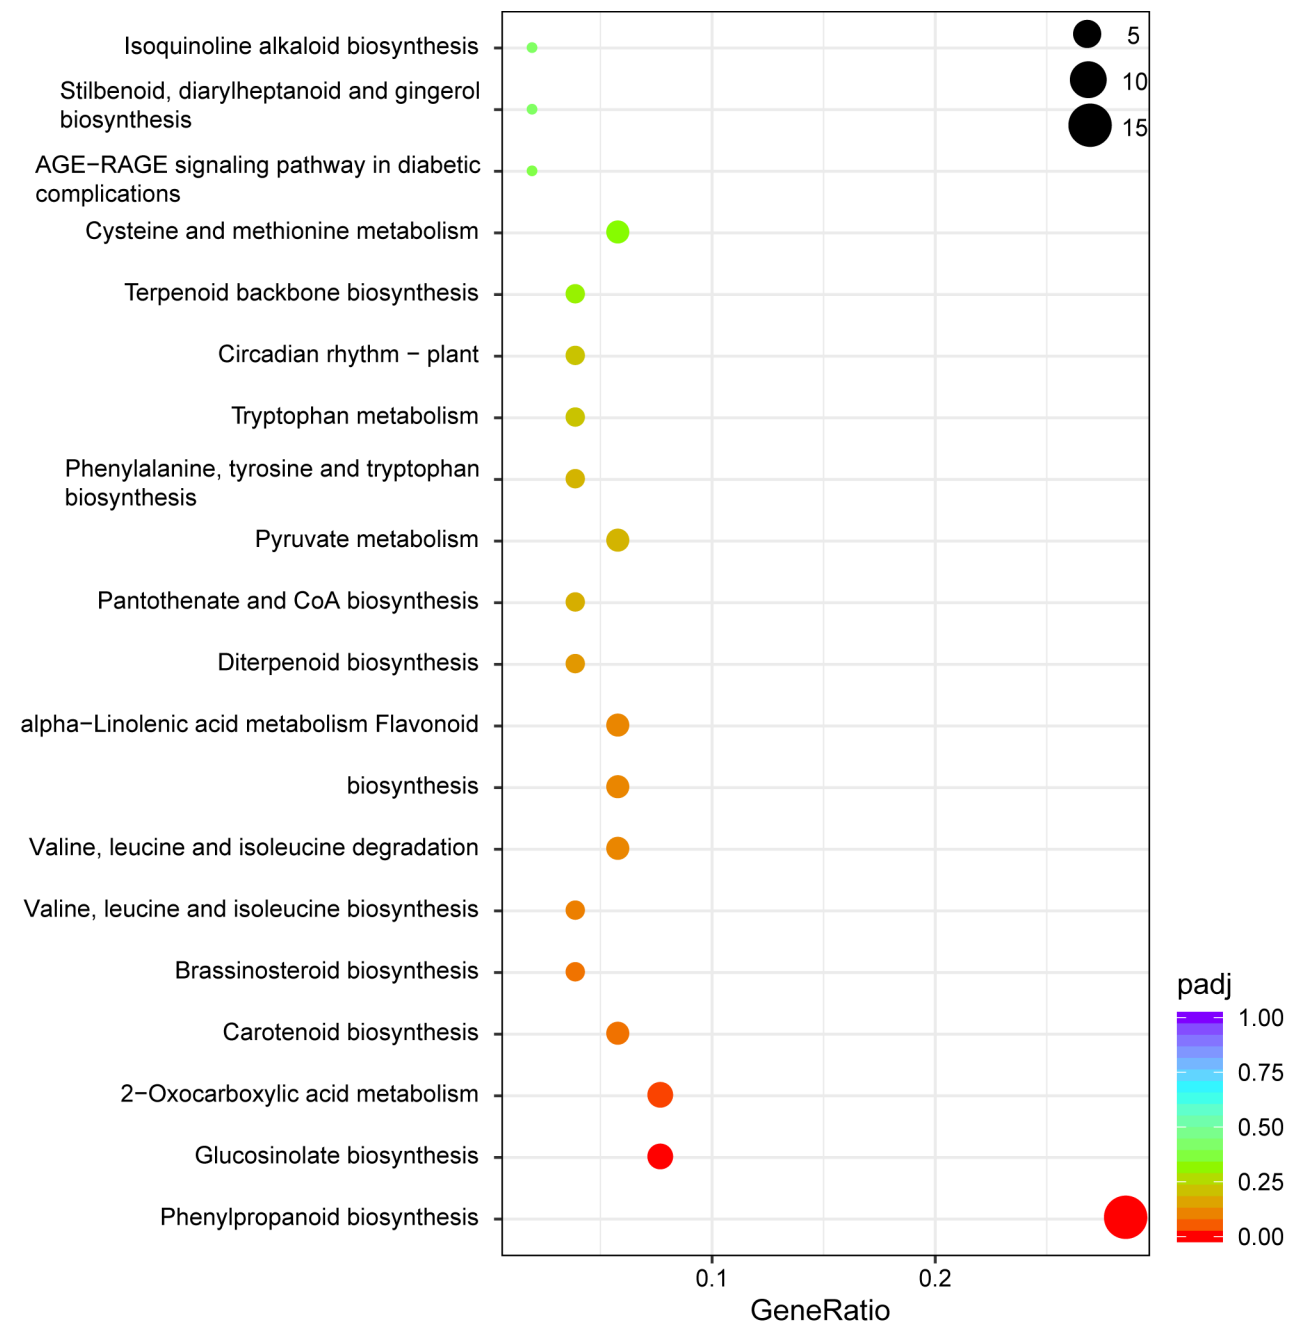

# LT24 vs LT12 GO

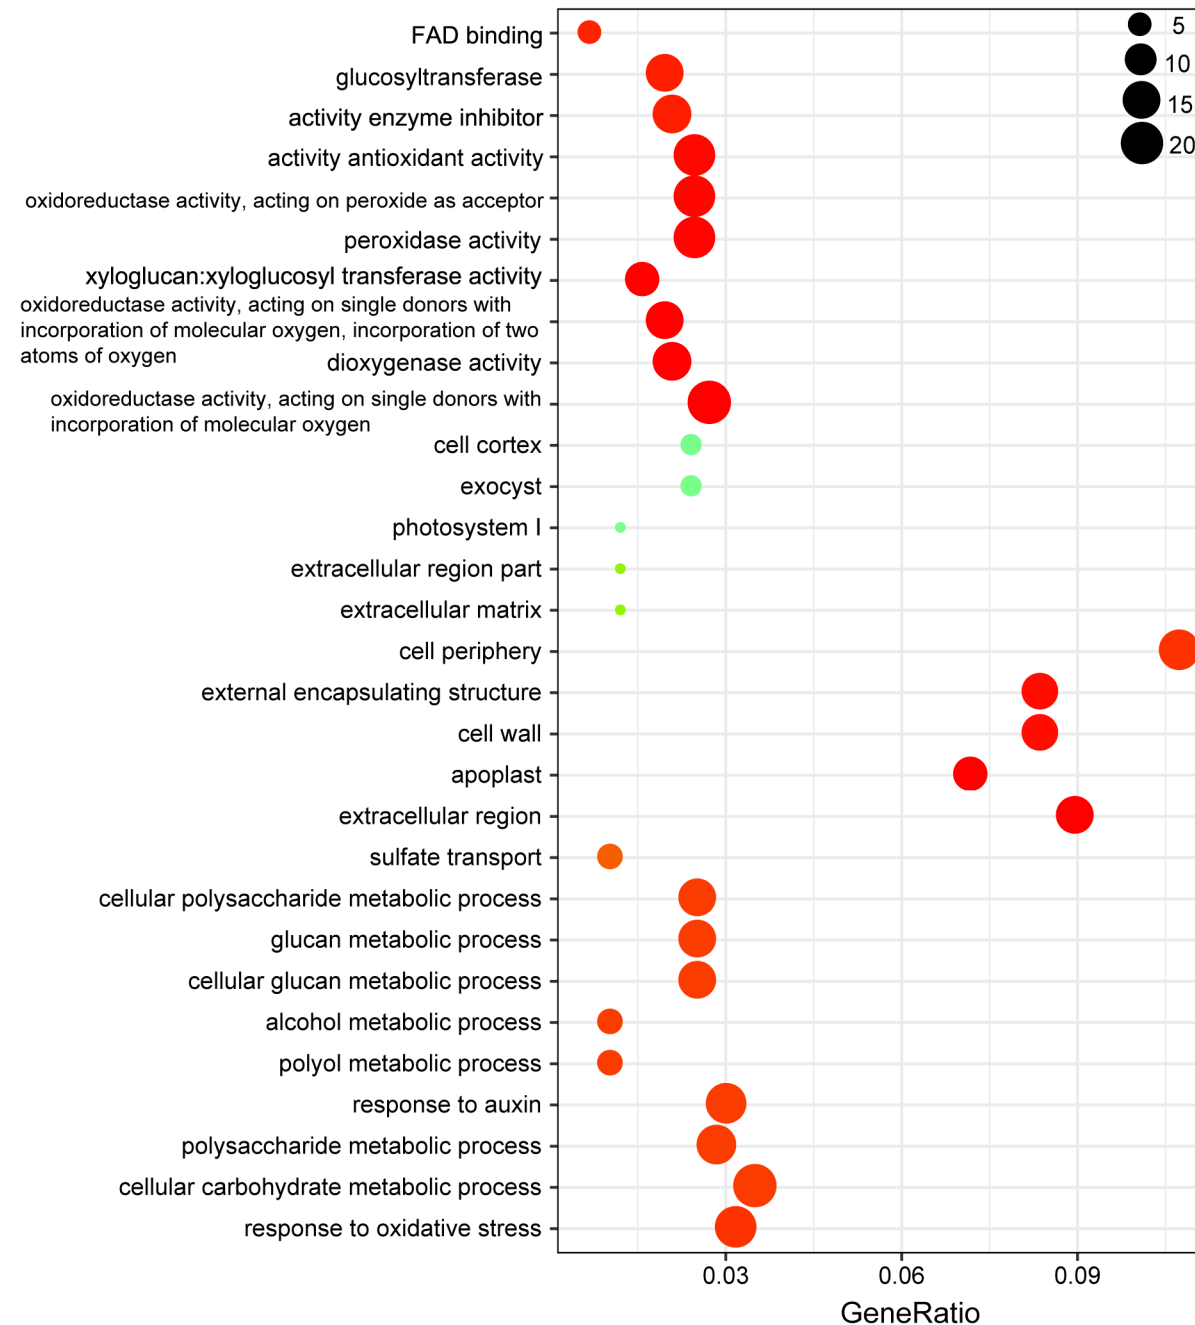

# LT24 vs LT12 KEGG

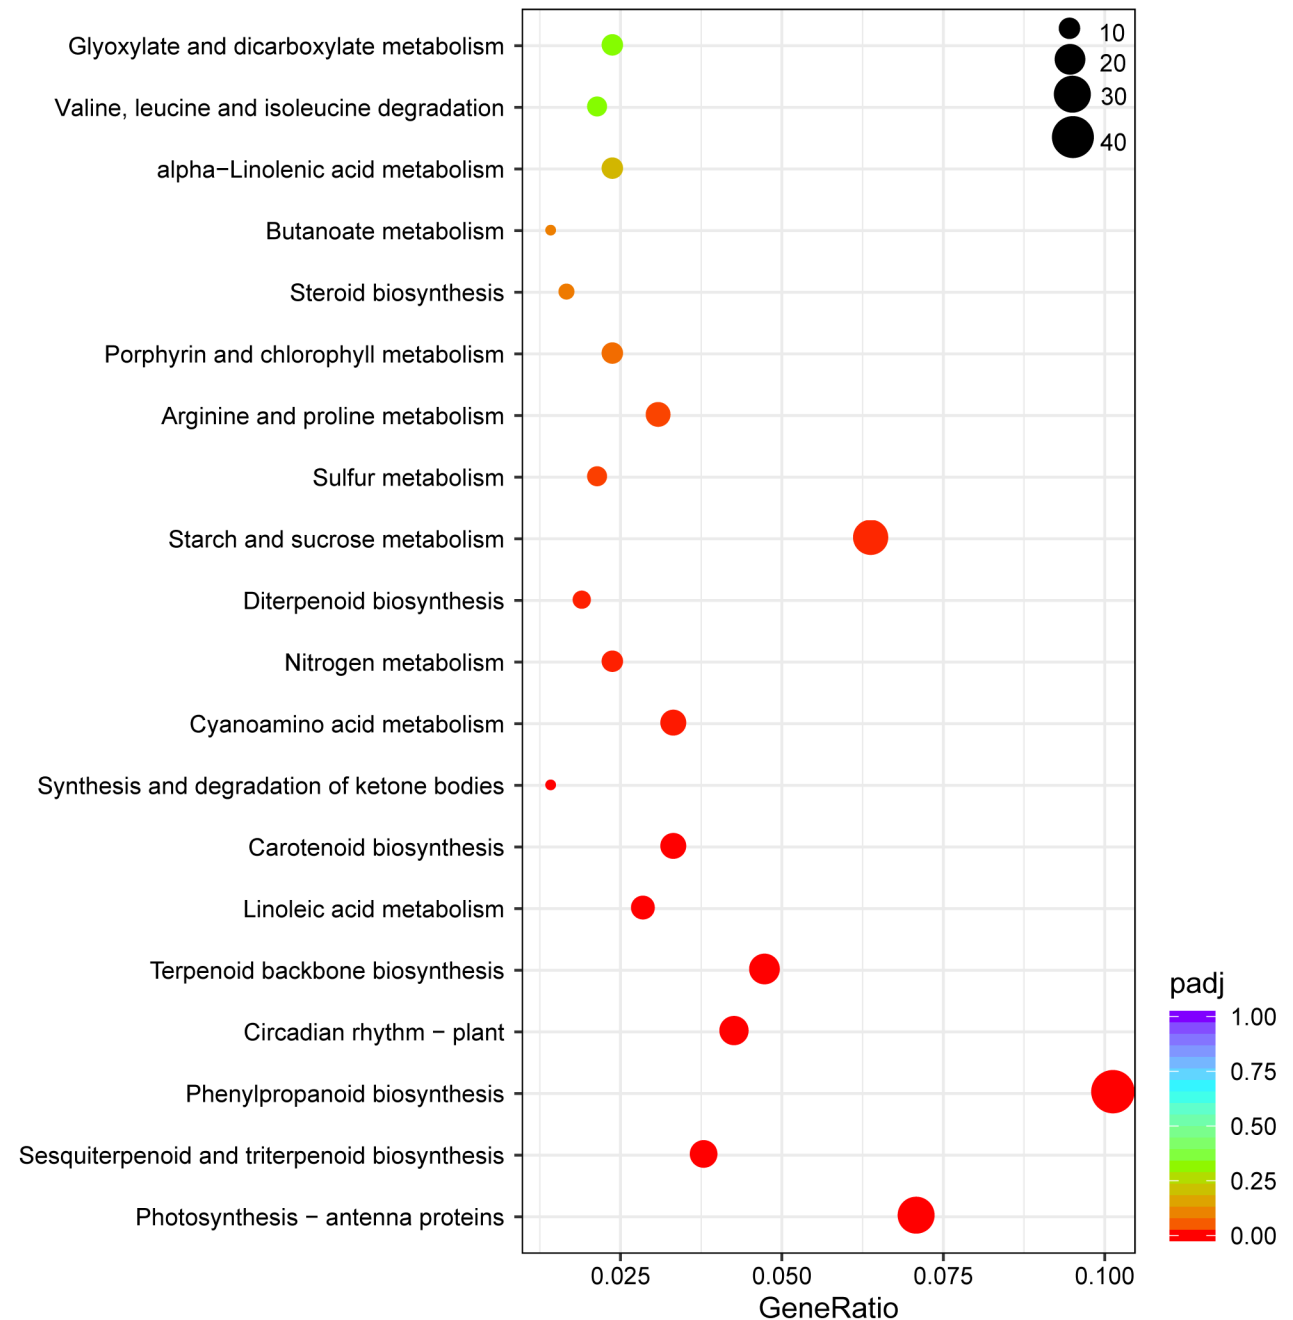

# LT72 vs LT24 GO

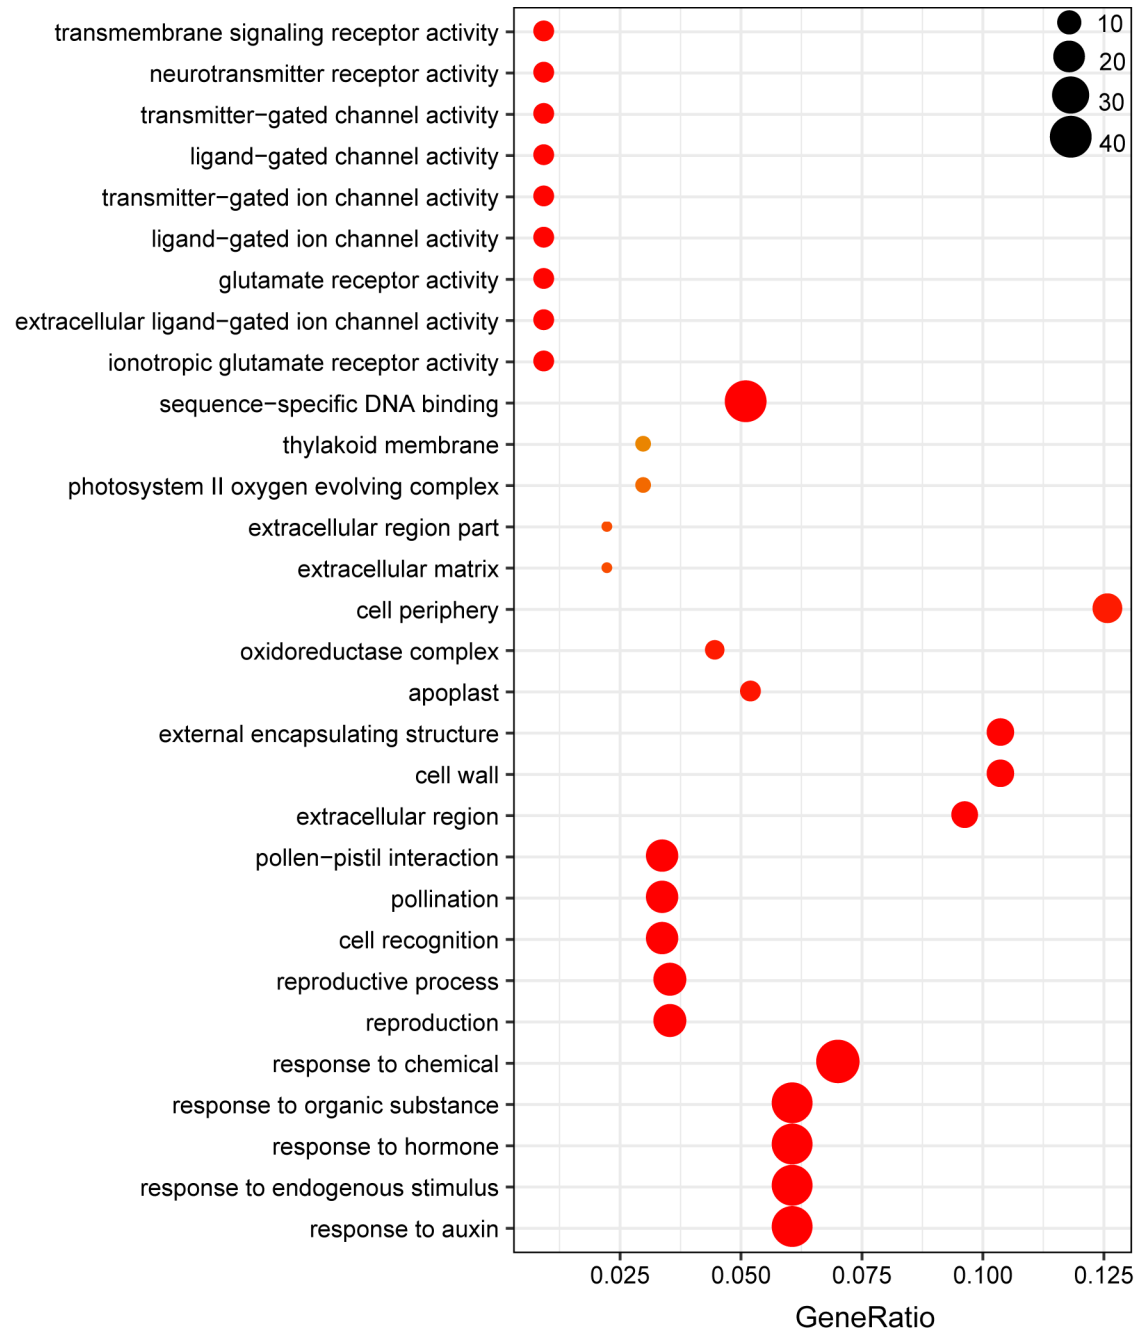

# LT72 vs LT24 KEGG

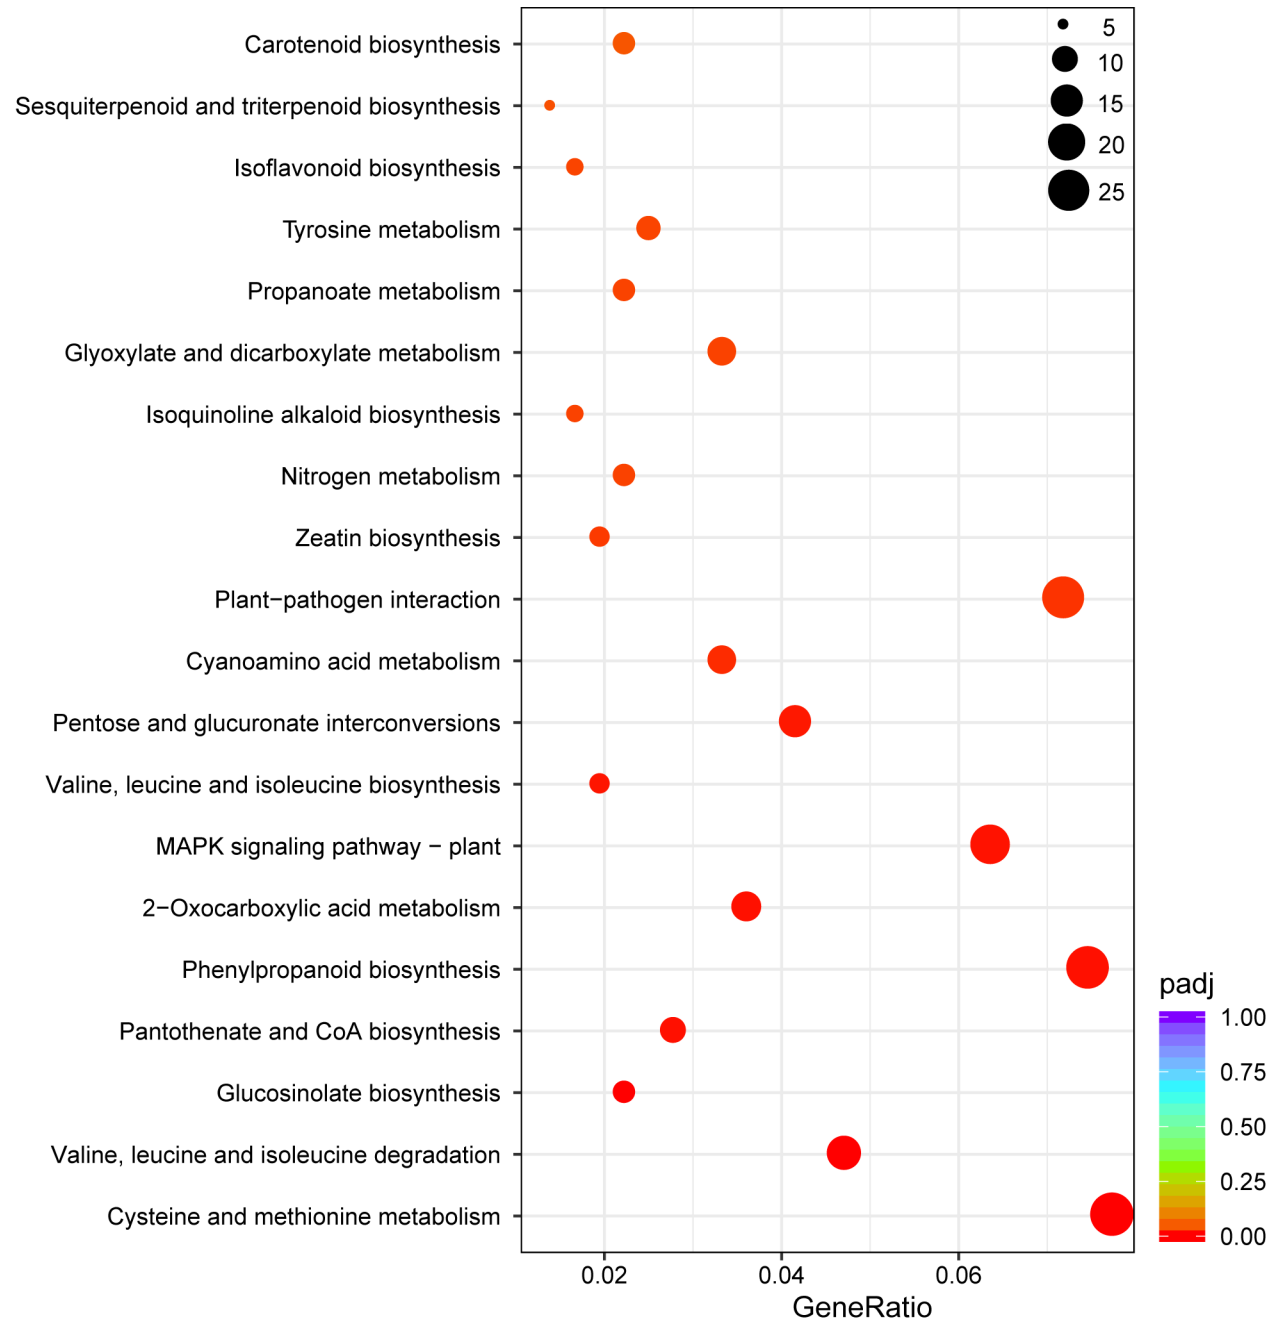



# LT72 vs LT0 GO

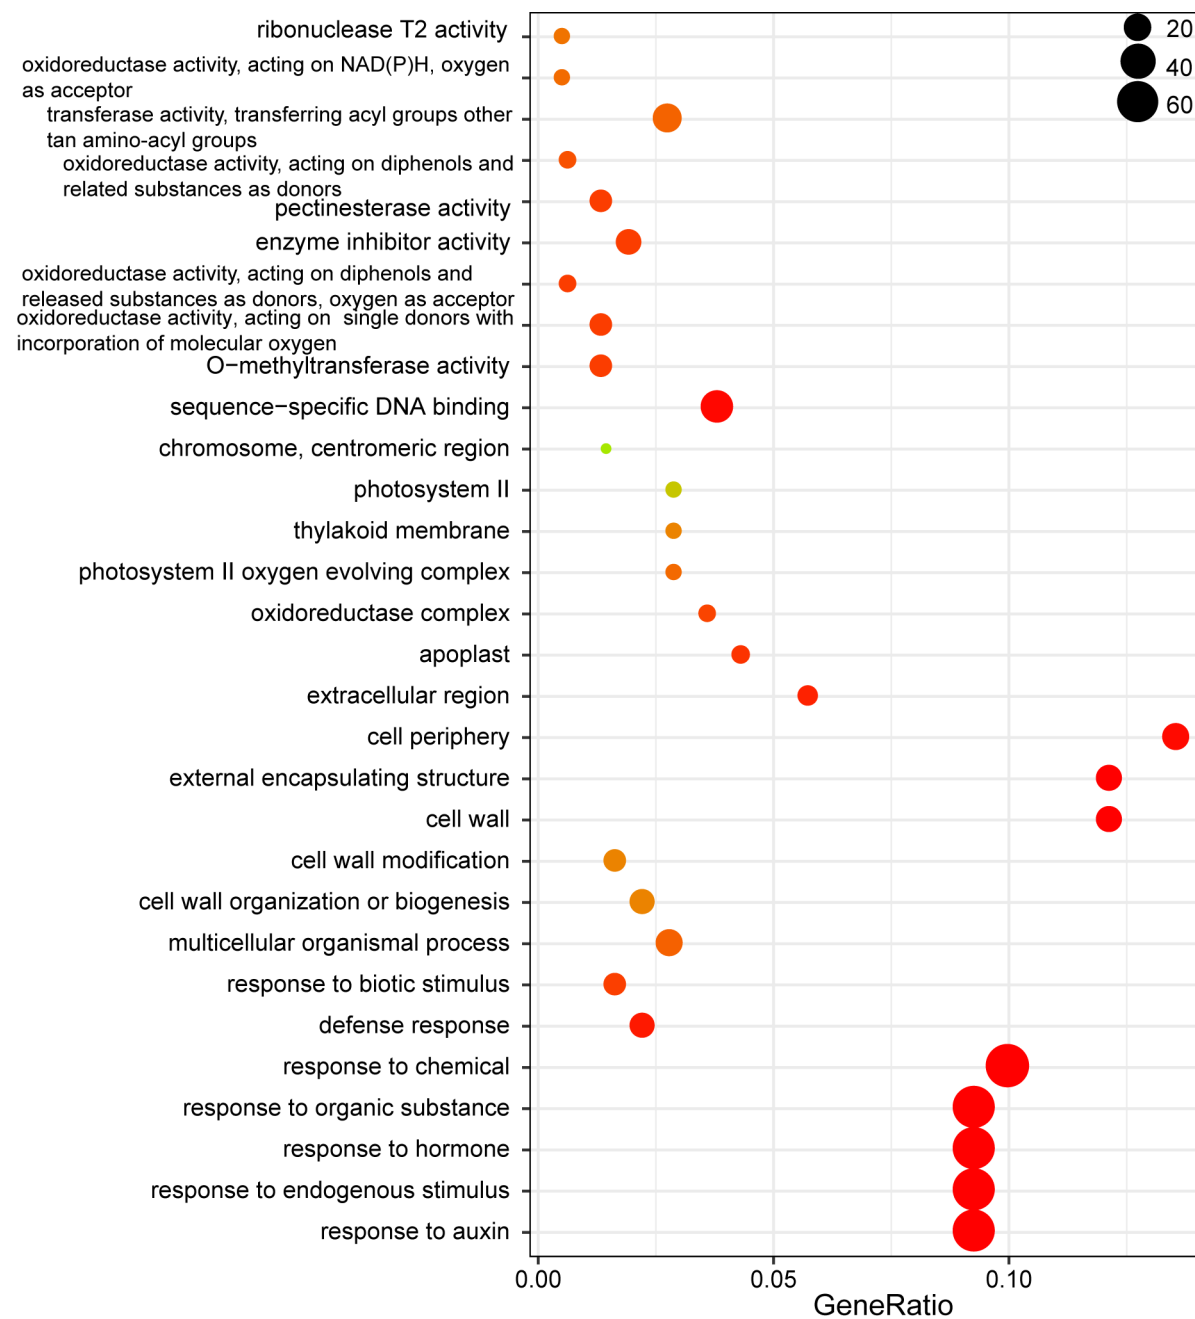

# LT72 vs LT0 KEGG

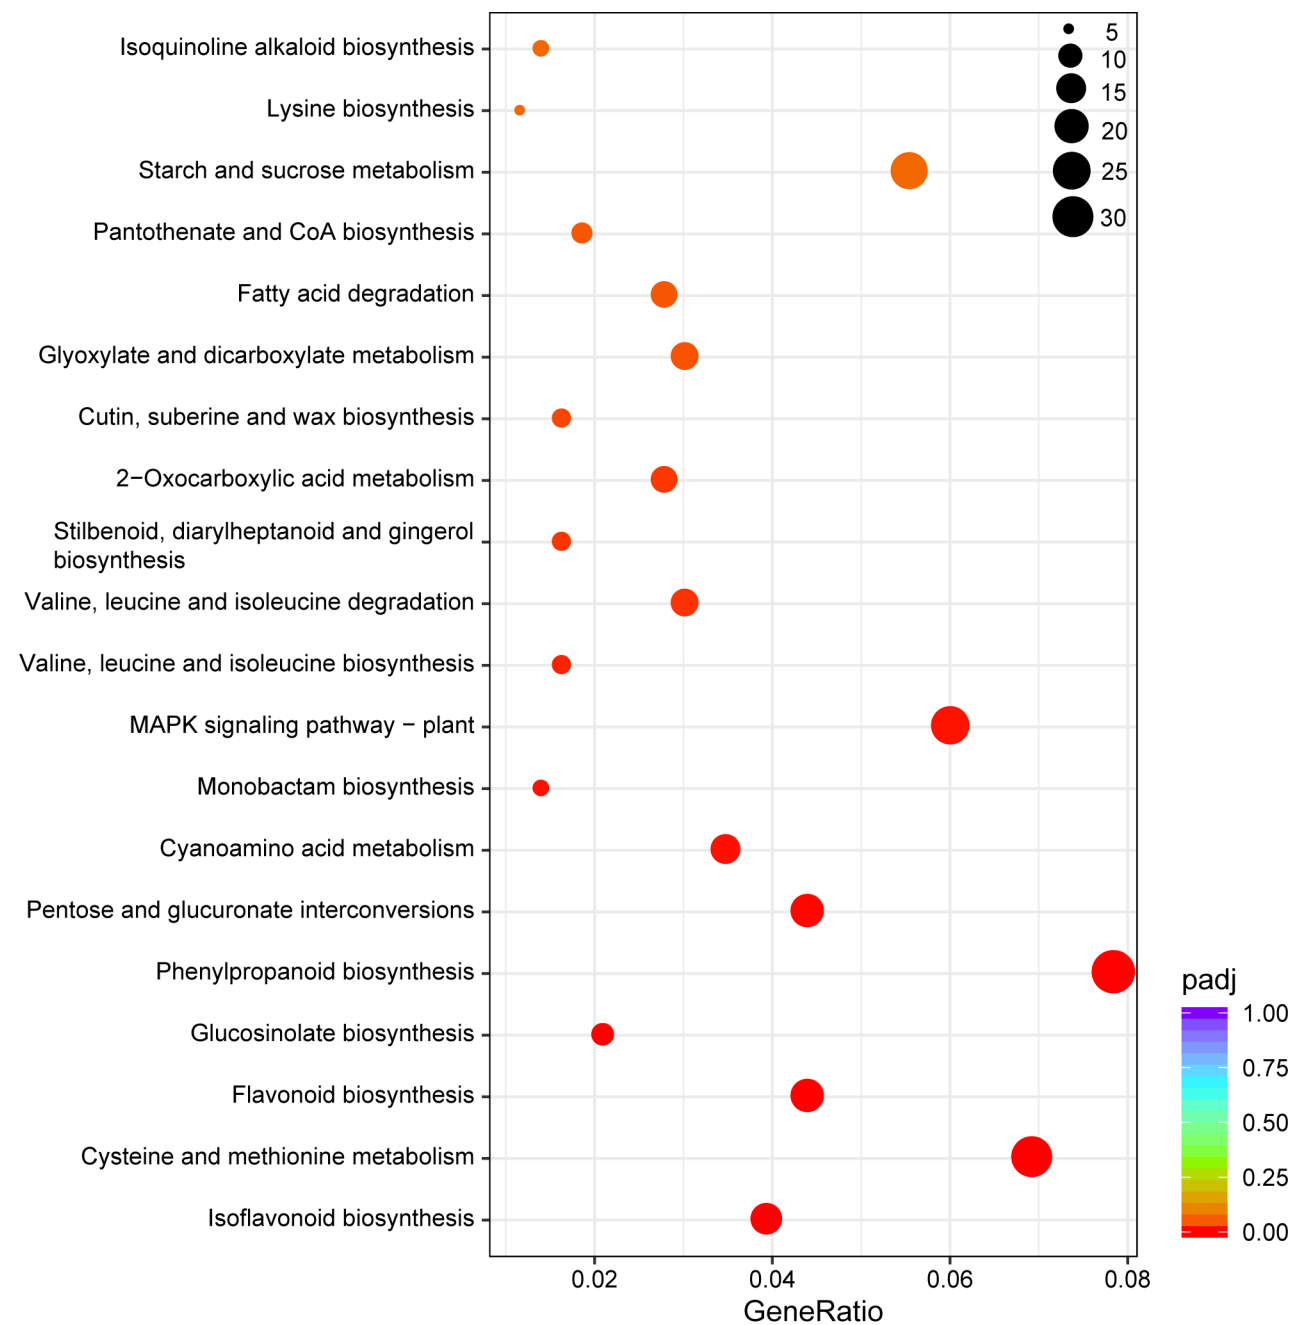

Supplement: s1 [file s1]
