# Supplementary figures and images for: Unraveling Cadmium Toxicity in Trifolium repens L. Seedling: Insight into Regulatory Mechanisms Using Comparative Transcriptomics Combined with Physiological Analyses
Source: MDPI journal article supplement (doi:10.3390/ijms23094612), 2022-04-21

**(a)**

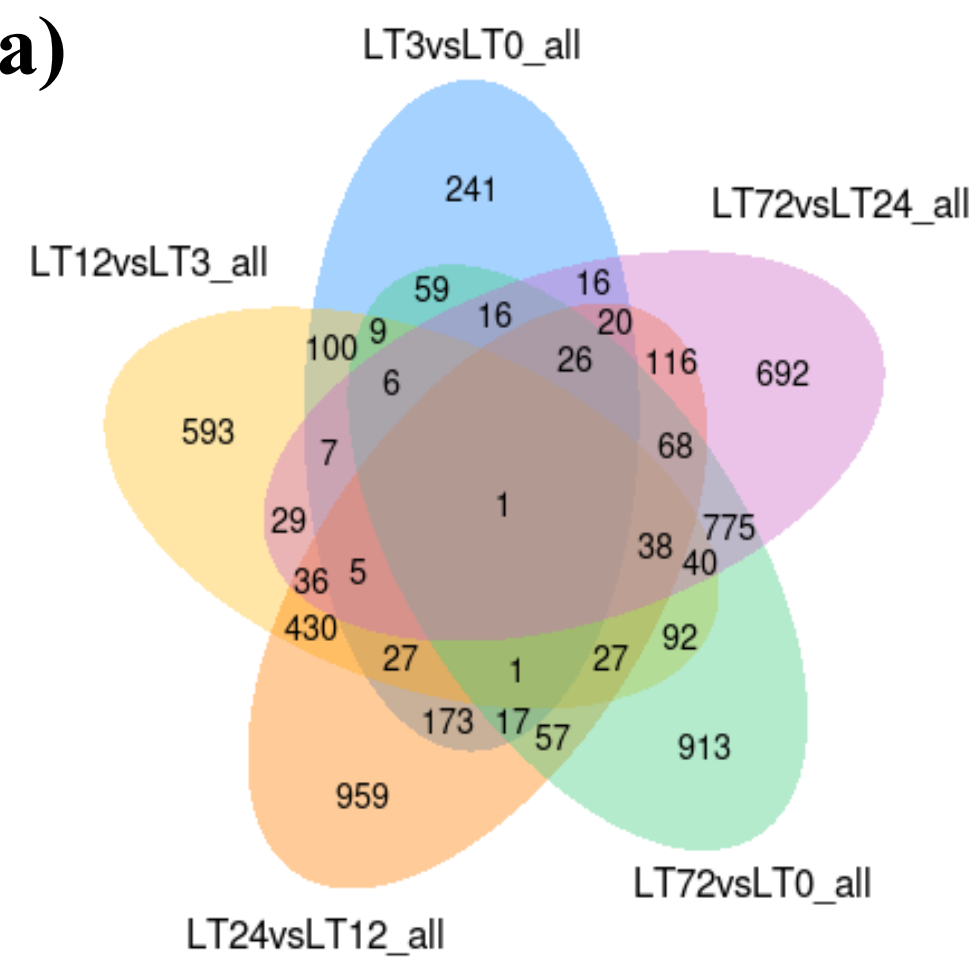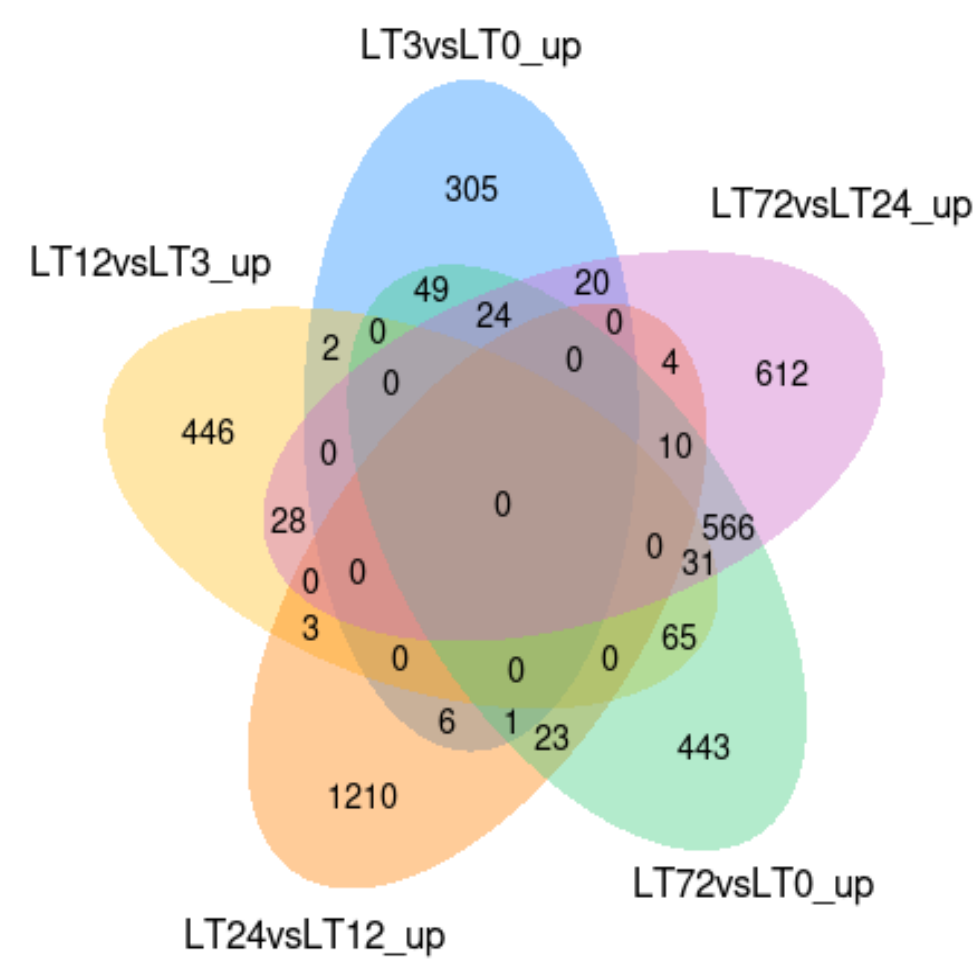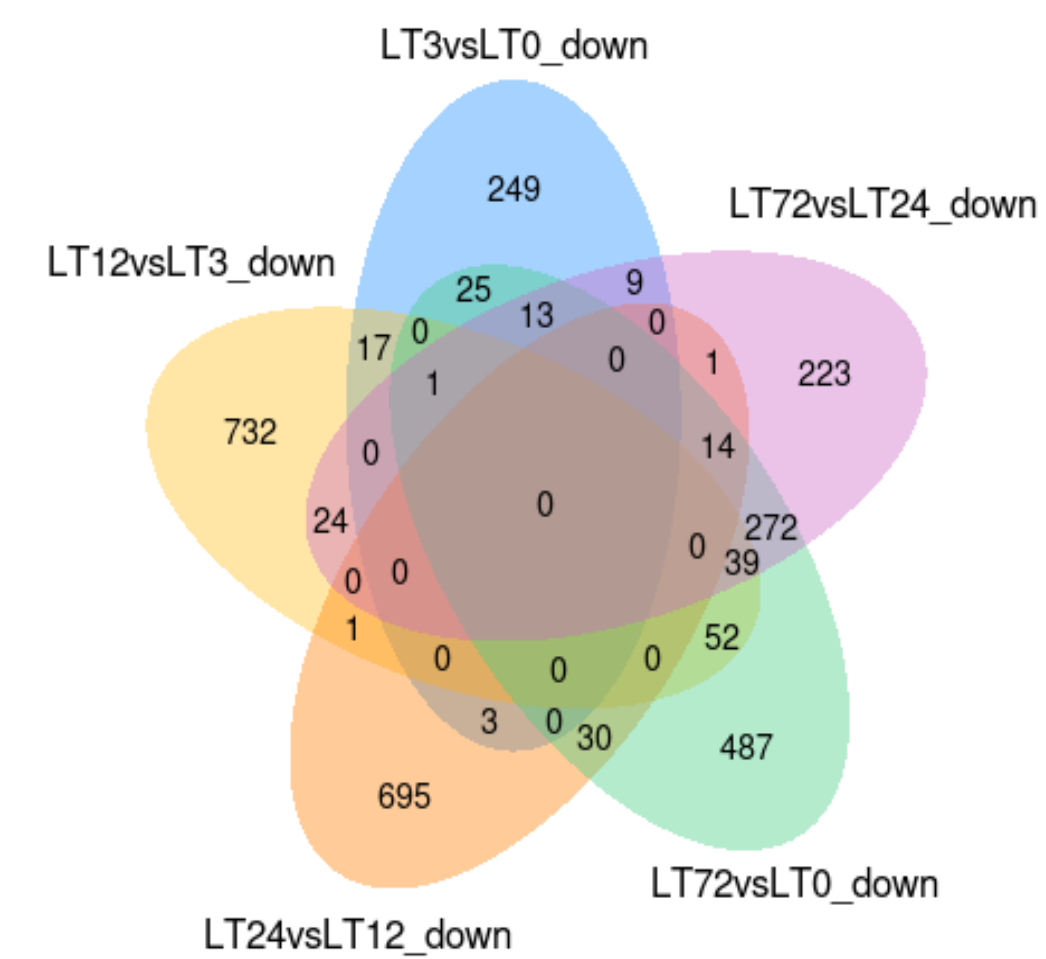

**(b)**

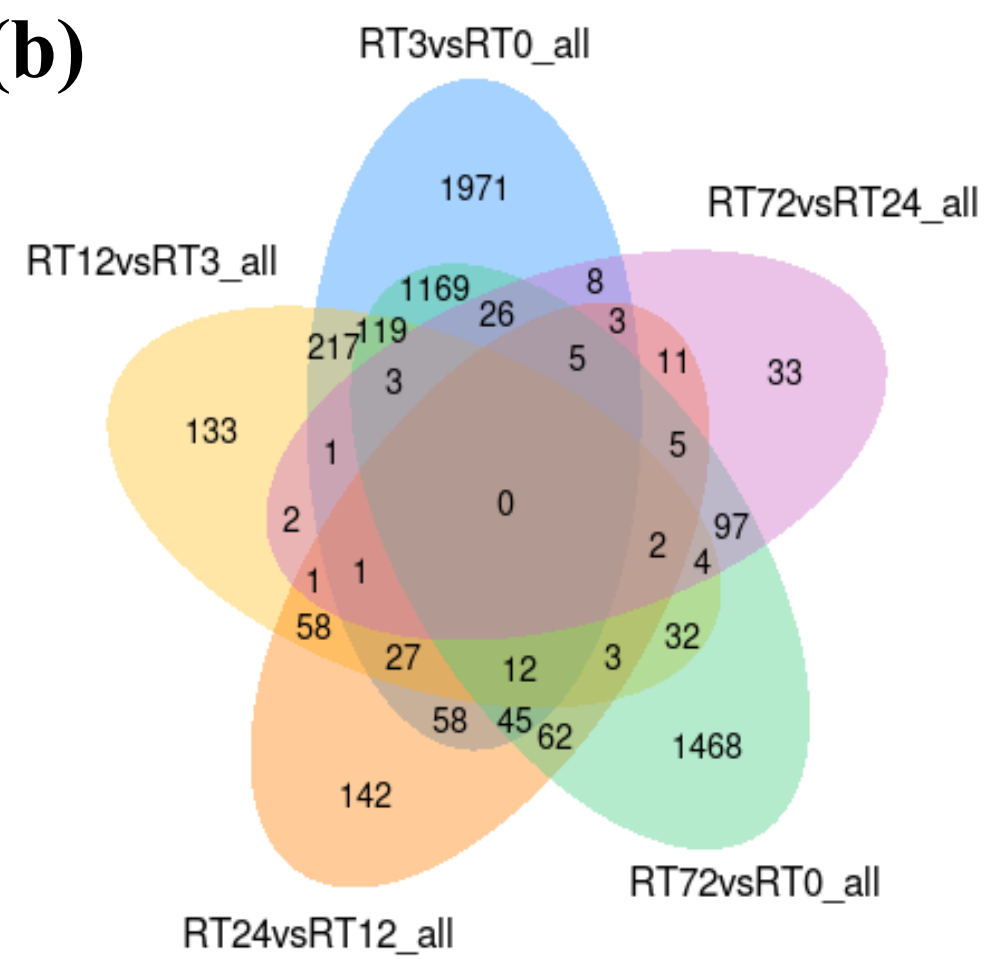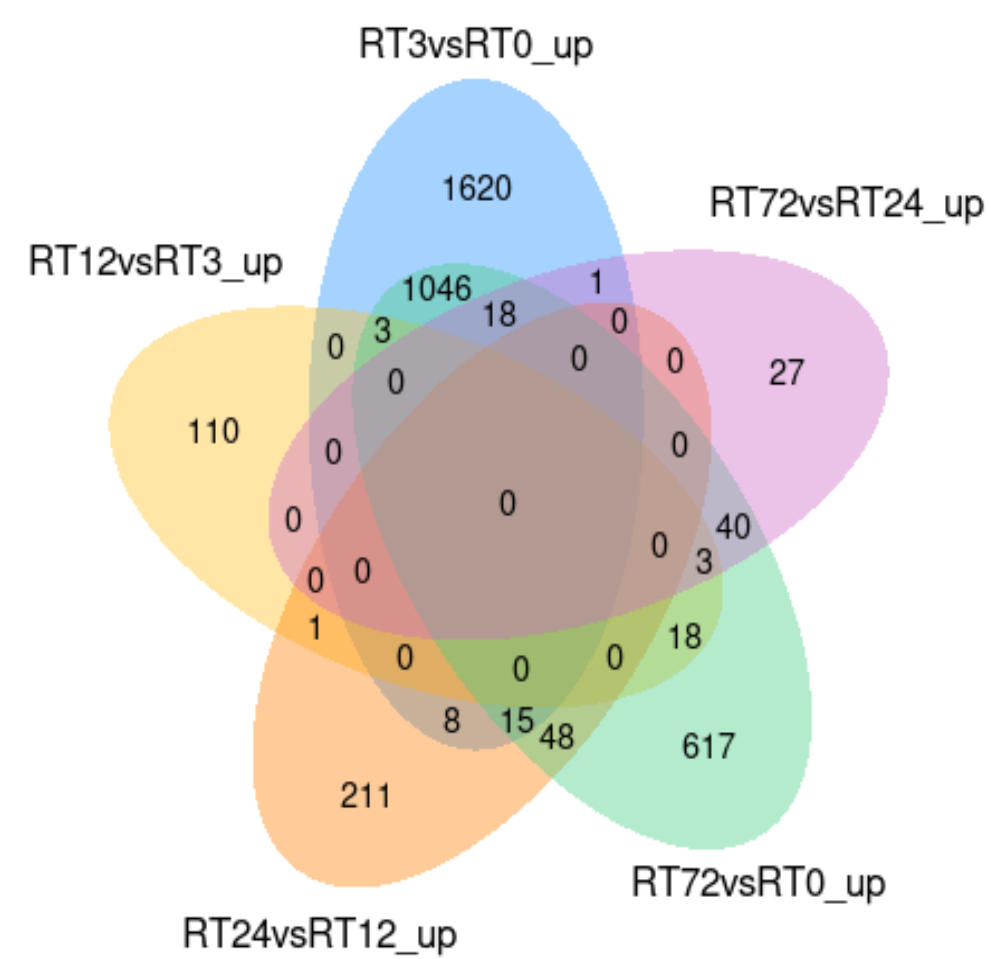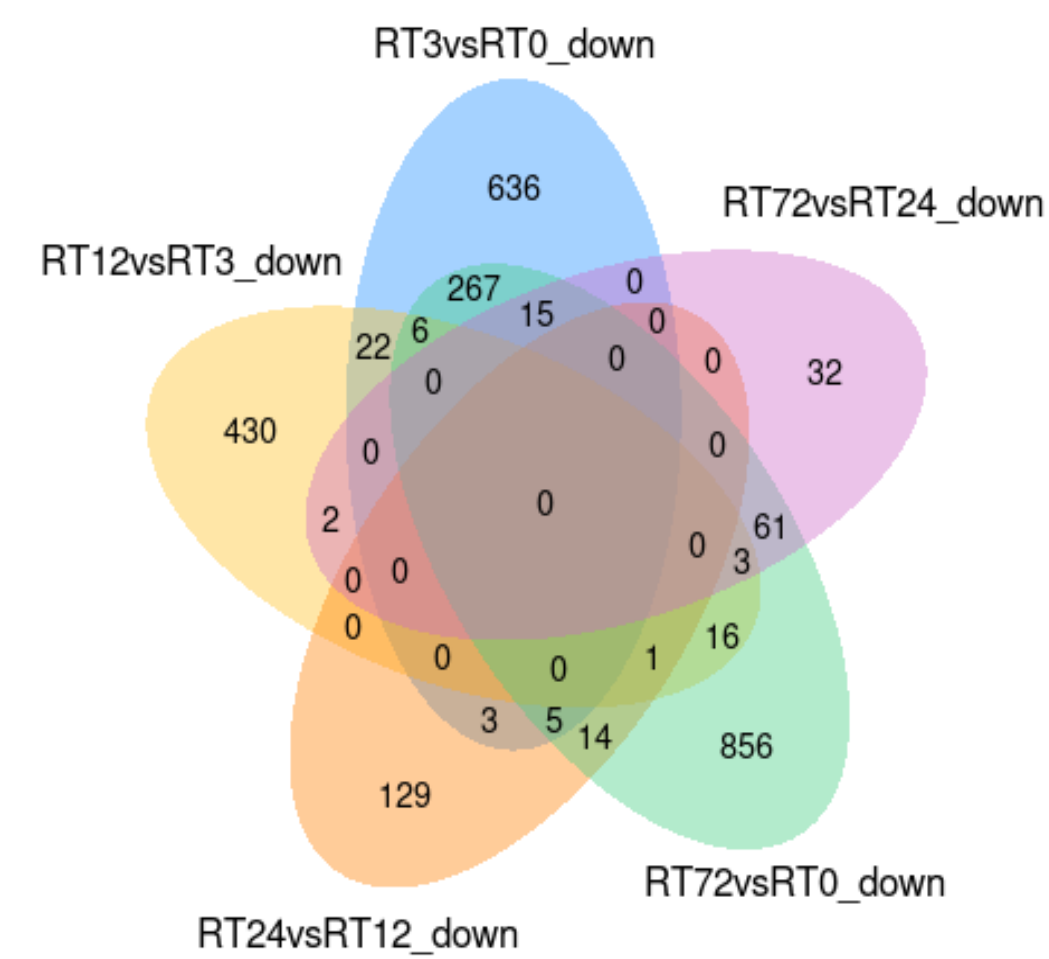

**(c)**

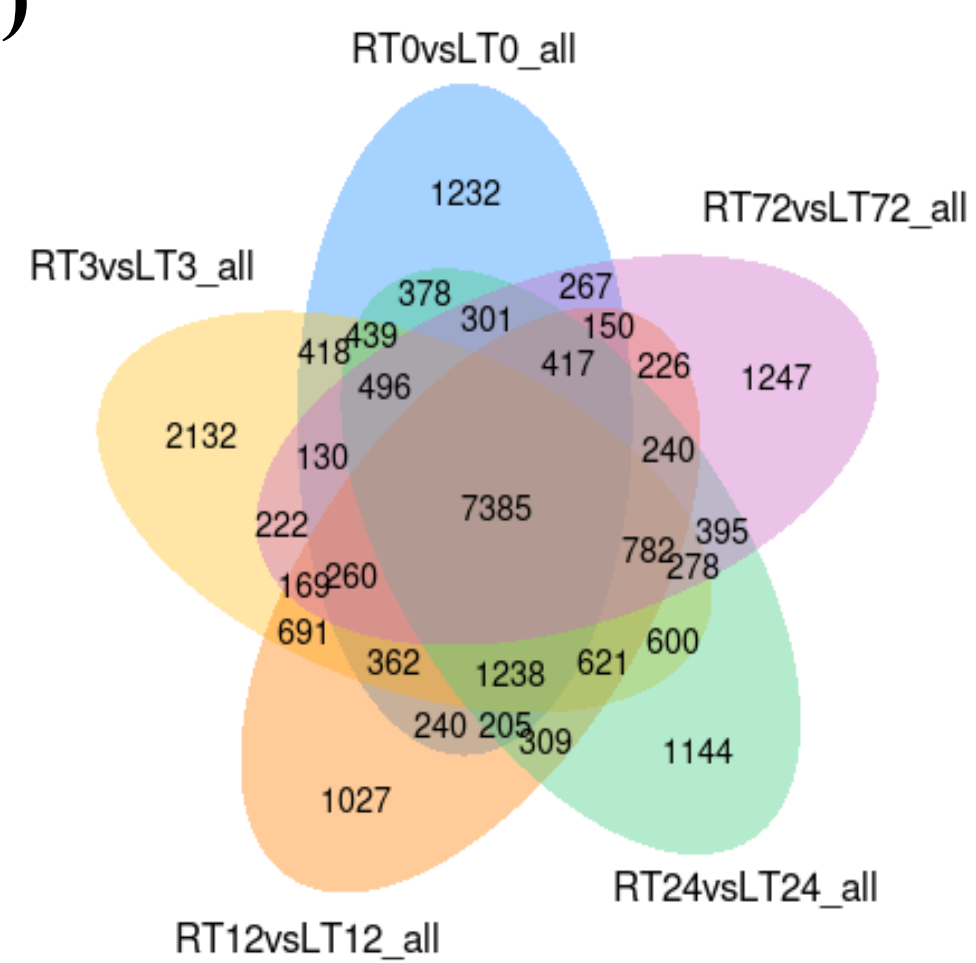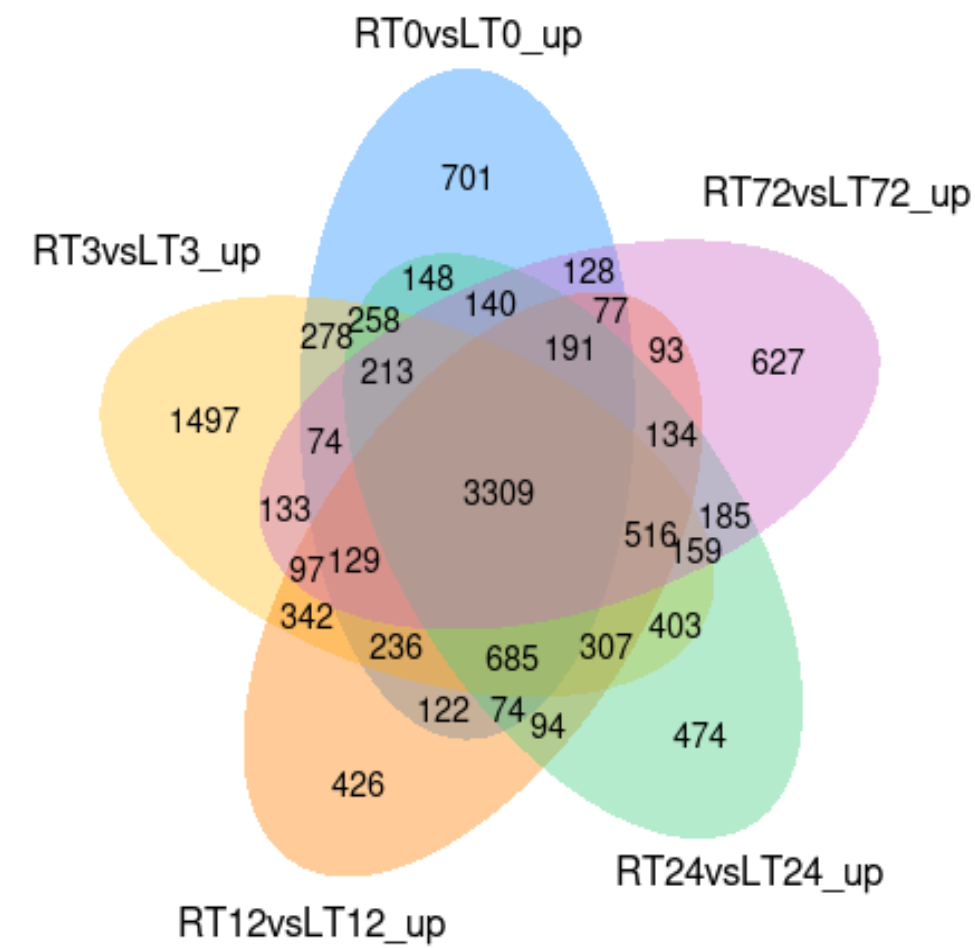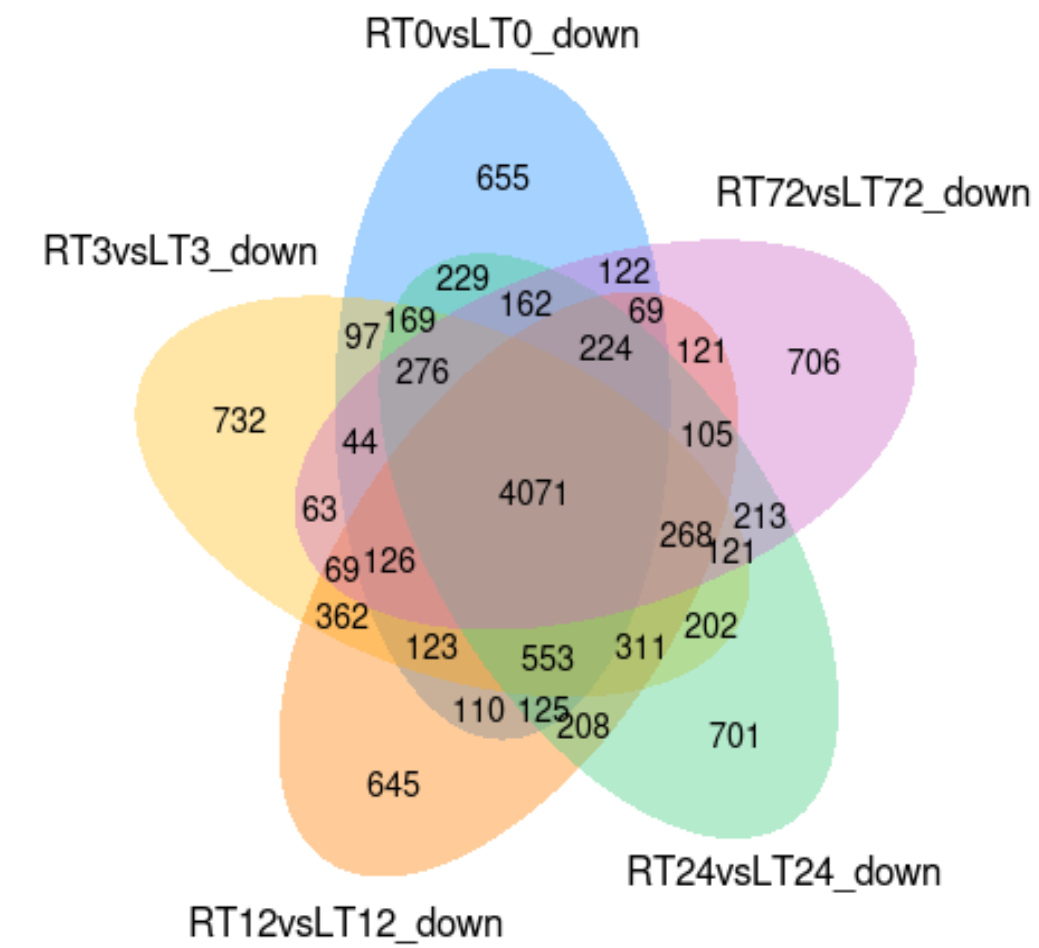

Supplement: s1 [file s1]
